# Supplementary material for: ZumBeat: Evaluation of a Zumba Dance Intervention in Postmenopausal Overweight Women
Source: PubMed Central journal article supplement (PMC5968936; doi:10.3390/sports4010005), 2016-01-25
Supplement: sports-04-00005-s001.pdf [file sports-04-00005-s001.pdf]

# Supplementary Materials: ZumBeat: Evaluation of a Zumba Dance Intervention in Postmenopausal Overweight Women

Anja Rossmeissl, Soraya Lenk, Henner Hanssen, Lars Donath, Arno Schmidt-Trucksäss and Juliane Schäfer

**Table S1.** Brief description of the neuropsychological test battery.

| Acronym    | Full Test Name                                            | Brief Description of the Test                                                                                                                                                                                                                  |
|------------|-----------------------------------------------------------|------------------------------------------------------------------------------------------------------------------------------------------------------------------------------------------------------------------------------------------------|
| IWQOL [1]  | Impact of Weight on Quality of Life                       | Assesses quality of life in overweight populations; 31 items in the categories bodily function, self-esteem, sexual life, public stress and work; scoring on a 5-point scale ranging from “never” to “always true”.                            |
| MRS [2]    | Menopausal Rating Scale                                   | Examines the severity of menopausal symptoms and their influence on quality of life, sensitive to changes over time.                                                                                                                           |
| SBB [3]    | Sports-Related Situational Barriers                       | Assesses external and internal situations that dissuade people from the intention to exercise; 13 situations on two subscales (psychological and physical barriers); score ranges between 1 and 4 per item.                                    |
| BDI-II [4] | Beck Depression Inventory                                 | Assesses severity of perceived symptoms in relation to possible underlying depression with 21 items on a 4-point scale.                                                                                                                        |
| ISR [5]    | ICD-10-Symptom Rating                                     | Assesses self-rated prevalence and severity of a large spectrum of psychological symptoms with 29 items on a 5-point Likert scale; 5 categories: depression, anxiety, obsessive/compulsive, somatoform, eating disorders, supplementary scale. |
| I-8 [6]    | Impulsivity-8                                             | Assesses the trait “impulsive behavior” on four subscales: urgency, intention, endurance and risk; with 2 items per subscale on a 5-point scale.                                                                                               |
| FEV [7]    | German version of the Dutch Eating Behavior Questionnaire | Fifty-one items assess eating behavior in the subscales dietary restraint (cognitive control), disinhibition and hunger; sum scores are calculated per subscale and compared to norms.                                                         |

**Table S2.** Effect of the 12-week ZumBeat dance intervention on cardiorespiratory fitness, anthropometry and psychometry after excluding outliers.

| Parameter                                    | Baseline (Mean (SD)) | Follow-up (Mean (SD)) | Change from Baseline (95% CI) | p-Value |
|----------------------------------------------|----------------------|-----------------------|-------------------------------|---------|
| VO <sub>2peak</sub> <sup>1</sup> , mL/kg/min | 24.7 (3.0)           | 24.5 (3.0)            | −0.2 (−0.8, 0.3)              | 0.382   |
| HR <sub>max</sub> <sup>2</sup> , bpm         | 163.6 (16.5)         | 163.1 (18.4)          | −0.5 (−3.7, 2.7)              | 0.735   |
| <i>Anthropometry</i>                         |                      |                       |                               |         |
| Percent body fat <sup>3</sup> , %            | 38.6 (8.2)           | 38.5 (7.3)            | −0.1 (−1.3, 1.2)              | 0.922   |
| Muscle mass <sup>4</sup> , kg                | 30.7 (5.3)           | 31.0 (5.2)            | 0.3 (−0.4, 1.1)               | 0.326   |
| <i>Psychometry</i>                           |                      |                       |                               |         |
| IWQOL (0 to 100)                             | –                    | –                     | –                             | –       |
| Total score <sup>4</sup>                     | 82.7 (12.7)          | 88.9 (9.1)            | 6.2 (1.8, 10.5)               | 0.009   |
| Physical function <sup>4</sup>               | 78.7 (14.0)          | 83.4 (13.8)           | 4.7 (−1.5, 11.0)              | 0.126   |
| Self-esteem <sup>4</sup>                     | 72.8 (24.0)          | 83.2 (20.2)           | 10.4 (3.5, 17.4)              | 0.007   |
| Sexual life <sup>4</sup>                     | 89.4 (23.2)          | 92.3 (18.8)           | 2.9 (−0.1, 5.8)               | 0.054   |
| Public distress <sup>5</sup>                 | 98.2 (4.6)           | 97.3 (4.7)            | −0.9 (−2.9, 1.1)              | 0.341   |
| Work <sup>6</sup>                            | 93.8 (9.2)           | 97.4 (5.6)            | 3.6 (0.1, 7.2)                | 0.046   |
| MRS <sup>3</sup> (0 to 44)                   | 10.2 (6.4)           | 9.2 (7.2)             | −1.1 (−2.4, 0.2)              | 0.097   |
| BDI <sup>7</sup> (0 to 63)                   | 5.9 (6.4)            | 4.5 (5.4)             | −1.5 (−4.0, 1.1)              | 0.235   |
| ISR <sup>7</sup> (0 to 4)                    | 0.5 (0.5)            | 0.5 (0.4)             | 0.0 (−0.1, 0.1)               | 0.453   |
| I-8 (0 to 4)                                 | –                    | –                     | –                             | –       |
| Urgency <sup>4</sup>                         | 2.3 (0.6)            | 2.1 (0.6)             | −0.2 (−0.4, 0.0)              | 0.035   |
| Endurance <sup>7</sup>                       | 4.2 (0.6)            | 4.1 (0.5)             | −0.1 (−0.3, 0.2)              | 0.549   |

Notes: Abbreviations:  $VO_{2peak}$ , peak oxygen consumption;  $HR_{max}$ , maximum heart rate; IWQOL, Impact of Weight on Quality of Life; MRS, Menopause Rating Scale; BDI, Beck Depression Inventory; I-8, German Version of the UPPS Impulsive Behavior Scale; ISR, ICD-10-Symptom-Rating; SD, standard deviation; CI, confidence interval. <sup>1</sup> After excluding two participants due to failure to reach exertion, available at baseline and follow-up in 11/15 participants; <sup>2</sup> after excluding two participants due to failure to reach exertion, available at baseline and follow-up in 10/15 participants; <sup>3</sup> after excluding two outliers (with an unusually strong decrease in percent body fat and MRS, respectively), available at baseline and follow-up in 12/15 participants; <sup>4</sup> after excluding one outlier (with an unusually strong increase in muscle mass, IWQOL total score, IWQOL physical function, IWQOL self-esteem, IWQOL sexual life and I-8 urgency, respectively), available at baseline and follow-up in 13/16 participants; <sup>5</sup> after excluding three outliers (with an unusually strong increase in IWQOL public distress), available at baseline and follow-up in 11/14 participants; <sup>6</sup> after excluding two outliers (with an unusually strong increase in IWQOL work), available at baseline and follow-up in 12/15 participants; <sup>7</sup> after excluding one outlier (with an unusually strong decrease in BDI, I-8 endurance and ISR, respectively), available at baseline and follow-up in 13/16 participants.

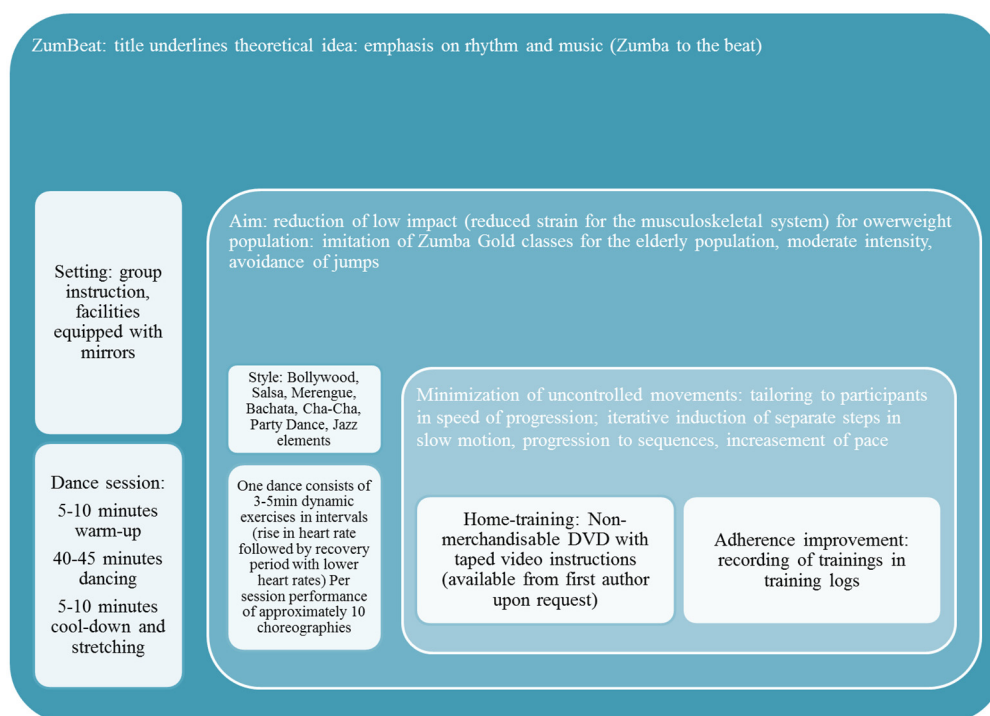

**Figure S1.** Detailed description of the ZumBeat dance intervention according to the TIDieR checklist [8].

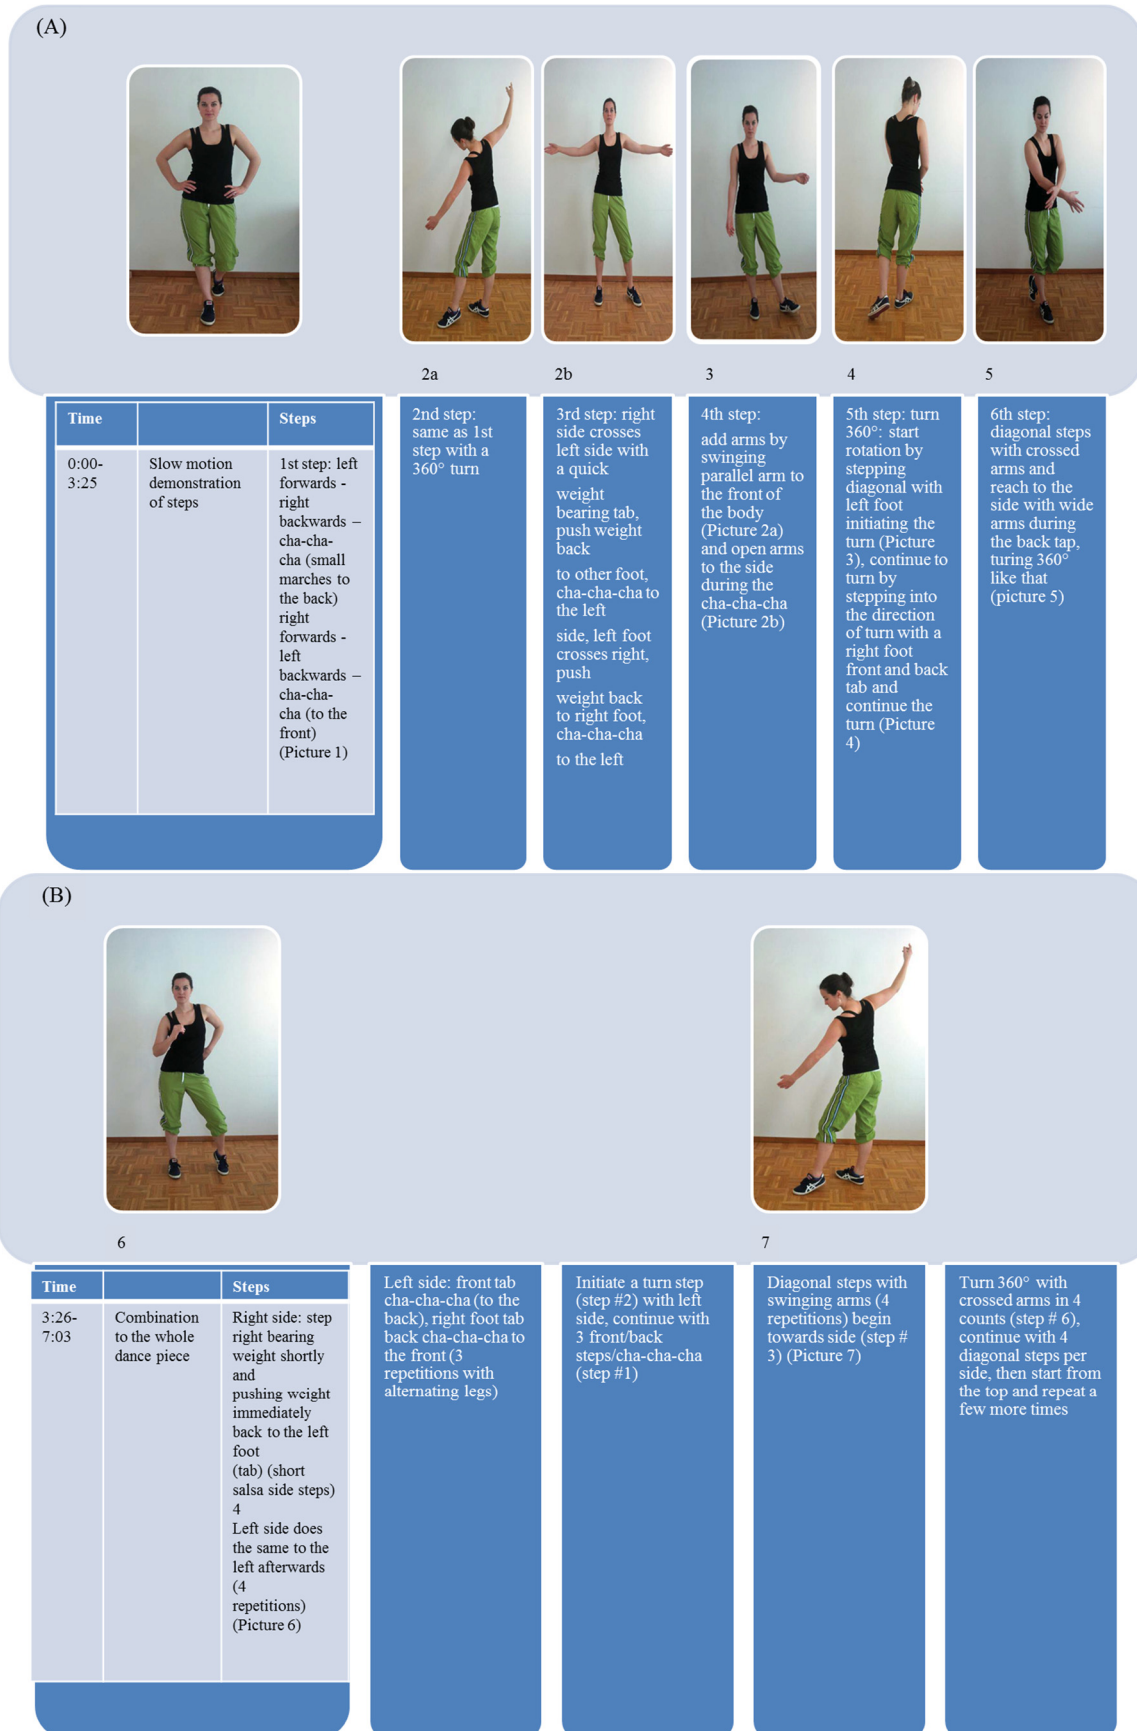

**Figure S2.** Exemplary description of dance Number 4 (cha-cha-cha). (A) Steps 1 to 5; (B) Steps 6 to 7.

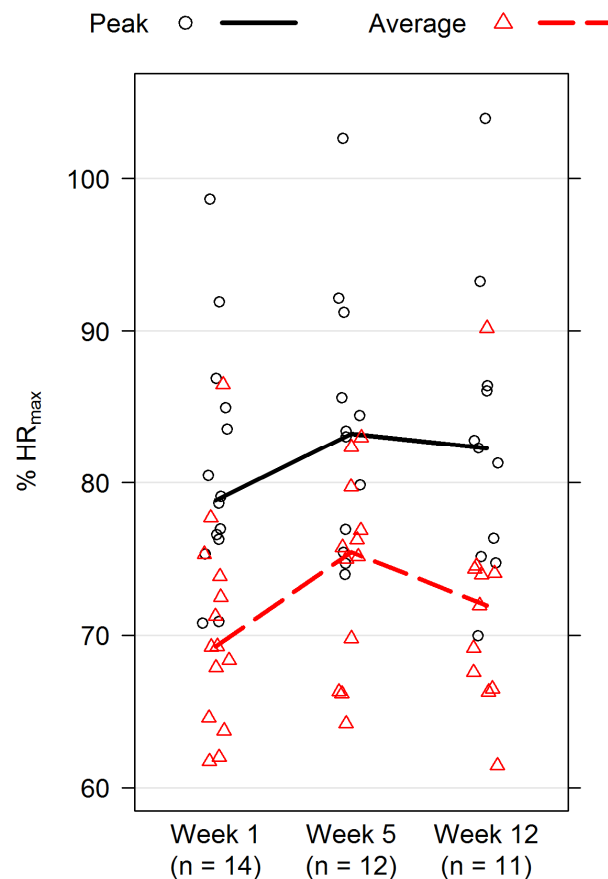

**Figure S3.** Peak and average heart rate in % of the maximum heart rate ( $HR_{max}$ ) during three (instructed) training sessions in Weeks 1, 5 and 12. The points denote individual measurements, jittered horizontally to avoid over-plotting. The lines join the medians of the points for the peak and average heart rate in % of the  $HR_{max}$ .

## References

1. Kolotkin, R.L.; Crosby, R.D.; Kosloski, K.D.; Williams, G.R. Development of a brief measure to assess quality of life in obesity. *Obes. Res.* **2001**, *9*, 102–111.
2. Potthoff, P.; Heinemann, L.A.; Schneider, H.P.; Rosemeier, H.P.; Hauser, G.A. The Menopause Rating Scale (MRS II): Methodological standardization in the German population. *Zentralbl. Gynakol.* **2000**, *122*, 280–286.
3. Krämer, L.; Fuchs, R. Barrieren und Barrierenmanagement im Prozess der Sportteilnahme. Zwei neue Messinstrumente. *Z. Gesundheitspsychol.* **2010**, *18*, 170–182.
4. Beck, A.T.; Steer, R.A.; Ball, R.; Ranieri, W. Comparison of beck depression inventories I and II in psychiatric outpatients. *J. Pers. Assess.* **1996**, *67*, 588–597.
5. Tritt, K.; von Heymann, F.; Zaudig, M.; Zacharias, I.; Sollner, W.; Loew, T. Development of the “ICD-10-Symptom-Rating” (ISR) questionnaire. *Z. Psychosom. Med. Psychother.* **2008**, *54*, 409–418.
6. Kovaleva, A.; Beierlein, C.; Schmitt, M.; Kemper, C.J. Eine Kurzskaala zur Messung von Impulsivität nach dem UPPS-Ansatz: Die Skala impulsives Verhalten (I-8). In *GESIS Working Papers*; GESIS: Köln, Germany, 2012; Volume 20.
7. Pudiel, D.; Westenhöfer, J. *Fragebogen zum Essverhalten (FEV), Handanweisung*; Hogrefe: Göttingen, Germany, 1989.
8. Hoffmann, T.C.; Glasziou, P.P.; Boutron, I.; Milne, R.; Perera, R.; Moher, D.; Altman, D.G.; Barbour, V.; Macdonald, H.; Johnston, M.; et al. Better reporting of interventions: Template for intervention description and replication (TIDieR) checklist and guide. *BMJ* **2014**, *348*, g1687.
